# Supplementary material for: Neuraminidase-specific antibody responses are generated in naive and vaccinated newborn nonhuman primates following virus infection
Source: JCI journal article supplement (doi:10.1172/jci.insight.141655), 2020-12-02
Supplement: sd1 [file 1]

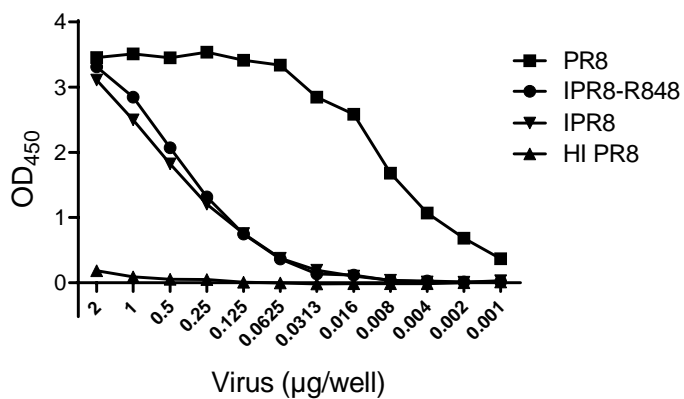

**SF1. Formalin inactivated PR8 has reduced NA activity compared to live PR8.** PR8, IPR8, IPR8-R848, and heat treated PR8 were tested for the level of NA activity using the ELLA assay. Heat inactivation was performed by placing virus at 56°C for 1 hour.
